# Supplementary material for: Ubiquitin specific peptidase (USP37) mediated effects in microscaffold-encapsulated cells: a comprehensive study on growth, proliferation and EMT
Source: Royal Society of Chemistry journal article supplement (doi:10.1039/d3ra08786g), 2024-01-01
Supplement: d3ra08786g2.pdf [file d3ra08786g2.pdf]

**A 3D cell culture platform to study the effect of Ubiquitin specific peptidase (USP37) in micro scaffold encapsulated cells and its effect on EMT.**

Shreemoyee De<sup>a#</sup>, Ravi Chauhan<sup>b#</sup>, Mayank Singh<sup>b\*</sup> and Neetu Singh<sup>a,c\*</sup>

a Centre for Biomedical Engineering, Indian Institute of Technology Delhi, Hauz Khas, New Delhi-110016, India

b Department of Medical Oncology (Lab), All India Institute of Medical Sciences, New Delhi, India

c Biomedical Engineering Unit, All India Institute of Medical Sciences, Ansari Nagar, New Delhi-110029, India

**Email:** [shreemoyee.de@iitd.ac.in](mailto:shreemoyee.de@iitd.ac.in)<sup>a</sup>, [c.ravi117@gmail.com](mailto:c.ravi117@gmail.com)<sup>b</sup>, [sneetu@iitd.ac.in](mailto:sneetu@iitd.ac.in)<sup>a,c</sup>; [mayank.osu@gmail.com](mailto:mayank.osu@gmail.com)<sup>b</sup>

# Shreemoyee De and Ravi Chauhan contributed equally to this work

\*Corresponding Author

Dr. Neetu Singh, Dr. Mayank Singh

Email- [sneetu@iitd.ac.in](mailto:sneetu@iitd.ac.in), [mayank.osu@gmail.com](mailto:mayank.osu@gmail.com)

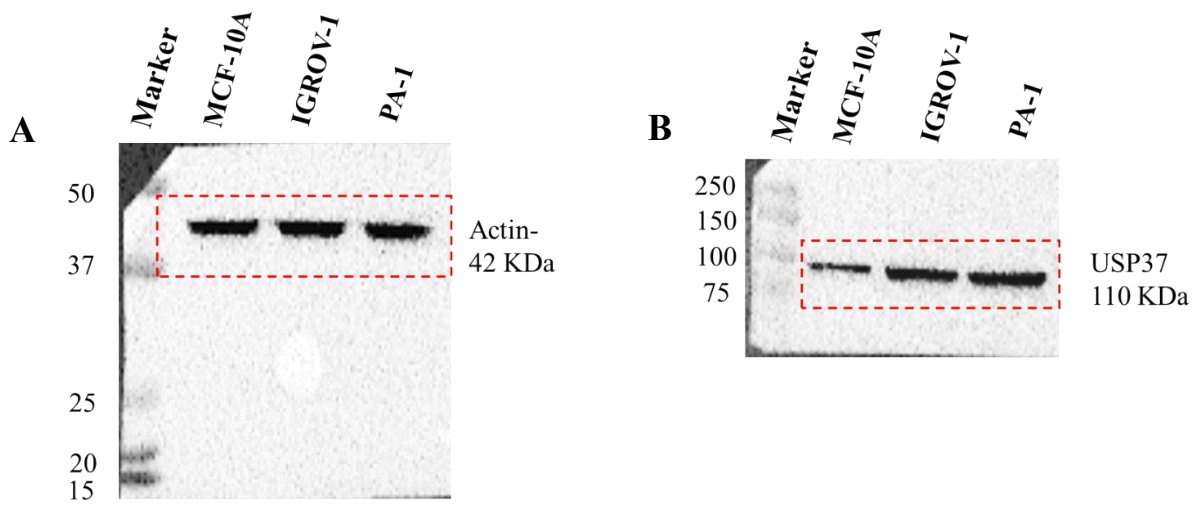

Supplementary figure: Raw images for the western blot shown in figure 1D. A. Raw western blot capture by chemiluminescence for  $\beta$ -actin (loading control). B. Raw western blot capture by chemiluminescence for USP 37 expression level observed in ovarian cancer cell lines (IGROV-1 and PA-1) with respect to non-transformed cancer cell line (MCF-10A)
