# Supplementary material for: Ubiquitin specific peptidase (USP37) mediated effects in microscaffold-encapsulated cells: a comprehensive study on growth, proliferation and EMT
Source: Royal Society of Chemistry journal article supplement (doi:10.1039/d3ra08786g), 2024-01-01
Supplement: d3ra08786g3.pdf [file d3ra08786g3.pdf]

**A 3D cell culture platform to study the effect of Ubiquitin specific peptidase (USP37) in micro scaffold encapsulated cells and its effect on EMT.**

Shreemoyee De<sup>a#</sup>, Ravi Chauhan<sup>b#</sup>, Mayank Singh<sup>b\*</sup> and Neetu Singh<sup>a,c\*</sup>

a Centre for Biomedical Engineering, Indian Institute of Technology Delhi, Hauz Khas, New Delhi-110016, India

b Department of Medical Oncology (Lab), All India Institute of Medical Sciences, New Delhi, India

c Biomedical Engineering Unit, All India Institute of Medical Sciences, Ansari Nagar, New Delhi-110029, India

**Email:** [shreemoyee.de@iitd.ac.in](mailto:shreemoyee.de@iitd.ac.in)<sup>a</sup>, [c.ravi117@gmail.com](mailto:c.ravi117@gmail.com)<sup>b</sup>, [sneetu@iitd.ac.in](mailto:sneetu@iitd.ac.in)<sup>a,c</sup>. ;  
[mayank.osu@gmail.com](mailto:mayank.osu@gmail.com)<sup>b</sup>

# Shreemoyee De and Ravi Chauhan contributed equally to this work

\*Corresponding Author

Dr. Neetu Singh, Dr. Mayank Singh

Email- [sneetu@iitd.ac.in](mailto:sneetu@iitd.ac.in), [mayank.osu@gmail.com](mailto:mayank.osu@gmail.com)

| GENE NAME      |         | Primer Sequence (5'-3')     | Sequence Length |
|----------------|---------|-----------------------------|-----------------|
| N-cadherin     | Forward | GAT GCT GAC GAT CCC AAT GCC | 21              |
|                | Reverse | GAT CAA GTC CAG CTG CCA CTG | 21              |
| E-cadherin     | Forward | GGA GTC ATC AGT GTG GTC ACC | 21              |
|                | Reverse | CGT GGT GGG ATT GAA GAT CGG | 21              |
| GAPDH          | Forward | CTG CAC CAC CAA CTG CTT AGC | 21              |
|                | Reverse | GGC ATG GAC TGT GGT CAT GAG | 21              |
| USP37          | Forward | TGG CTC TCT CGC TTA ACA     | 18              |
|                | Reverse | TGC ACT CCA ACC AAG GGT AA  | 20              |
| SNAIL          | Forward | CTG GCT GCT ACA AGG CCA TG  | 20              |
|                | Reverse | ACG CCT GGC ACT GGT ACT TC  | 20              |
| TWIST          | Forward | GGG AGT CCG CAG TCT TAC GA  | 20              |
|                | Reverse | CAG CGT GGG GAT GAT CTT CC  | 20              |
| $\beta$ -actin | Forward | CTG CCG TTT TCC GTA GGA CT  | 20              |
|                | Reverse | ACC TAC ACC CAC AAC ACT GTC | 21              |

**Table 1:** List of all the primers used in the manuscript

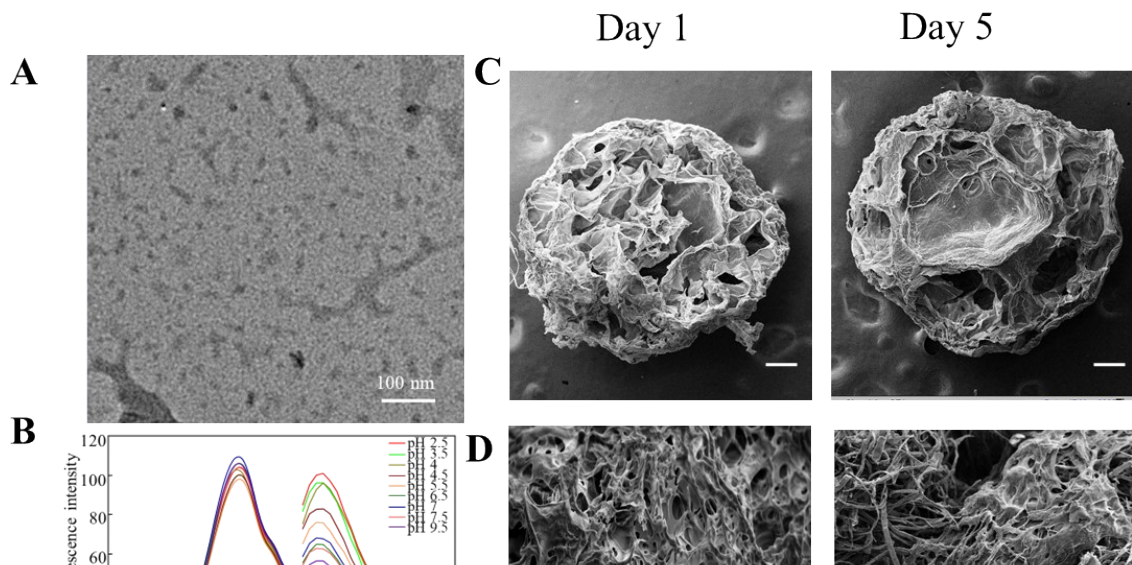

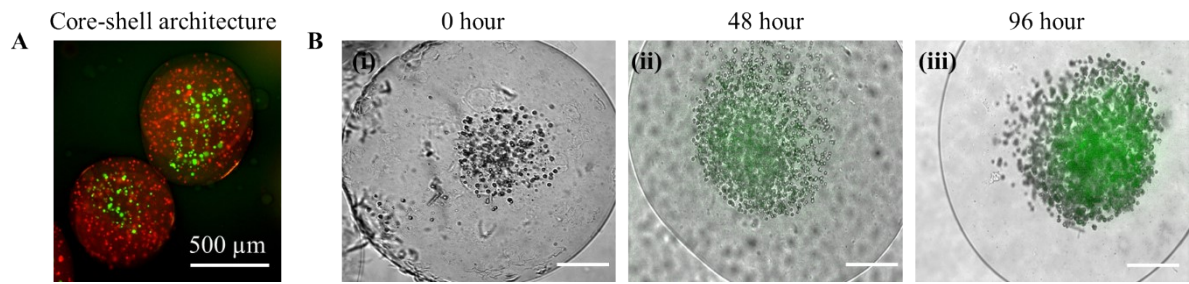

**Figure S2:** A. Microscopic fluorescent imaging of the encapsulated labeled cells (MG63) at 2.5X magnification; show the spatial arrangement of the cells in the microsphere (Green- CMFDA dye; Red- CM-Dil). B. Green fluorescence observed due to the fluorogenic dye, Hypoxia-IT, due to hypoxic regions in the micro-scaffold (imaged by bright field) at (i) 0 hours (ii) 48 hours and (iii) 96 hours at 4x magnification. (Scale bar: 200μm)

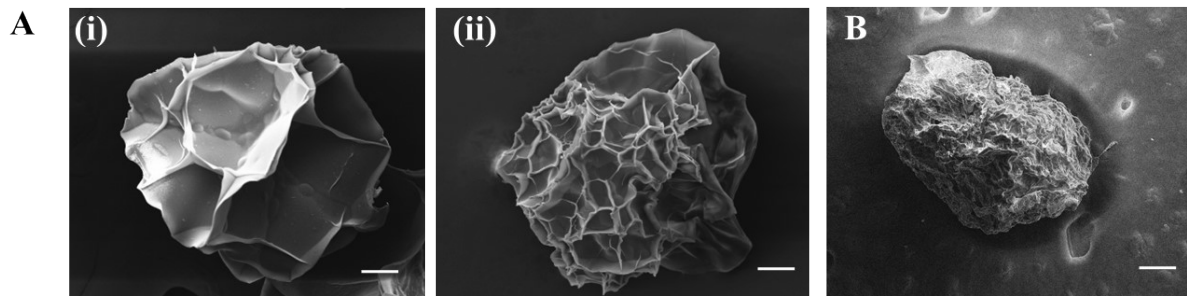

**Figure S3:** A.(i-ii) SEM micrographs showing of cross-linking density and the pore size variation (PEGDA: 3% and 8% in shell). (Scale bar for SEM images: 200μm). B. SEM micrographs for the micro-scaffolds with altered matrix composition by adding collagen in the mixture. (Scale bar for SEM images: 500μm)
