# Supplementary figures and images for: Ubiquitin specific peptidase (USP37) mediated effects in microscaffold-encapsulated cells: a comprehensive study on growth, proliferation and EMT
Source: Royal Society of Chemistry journal article supplement (doi:10.1039/d3ra08786g), 2024-01-01

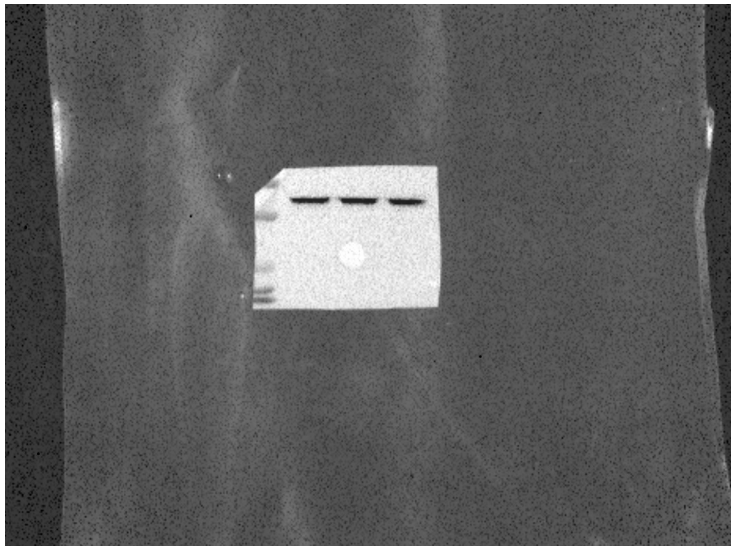

Supplement: d3ra08786g1.pdf [file d3ra08786g1.pdf]

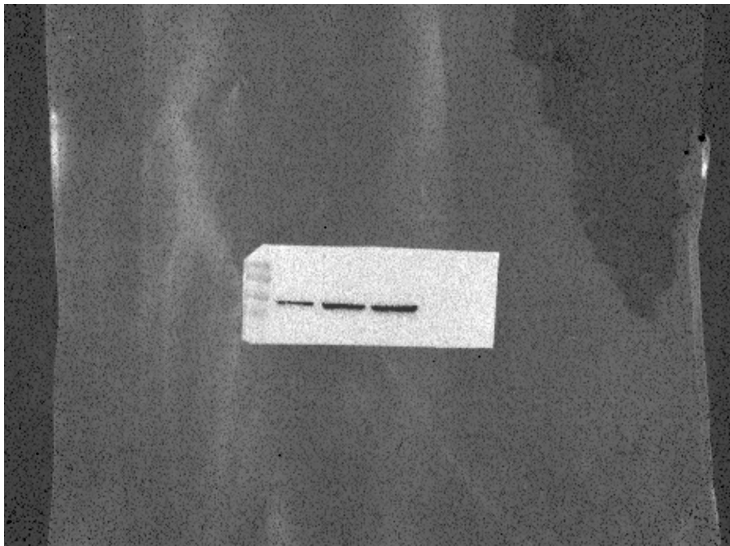

Supplement: d3ra08786g4.pdf [file d3ra08786g4.pdf]
